# Supplementary material for: Gold Nanoparticles Permit In Situ Absorbed Dose Evaluation in Boron Neutron Capture Therapy for Malignant Tumors
Source: MDPI journal article supplement (doi:10.3390/pharmaceutics13091490), 2021-09-16
Supplement: s1 [file s1]

## **Supplementary Materials: Gold Nanoparticles Permit in Situ Absorbed Dose Evaluation in Boron Neutron Capture Therapy for Malignant Tumors**

Alexander Zaboronok, Sergey Taskaev, Olga Volkova, Ludmila Mechetina, Anna Kasatova, Tatiana Sycheva, Kei Nakai, Dmitrii Kasatov, Aleksandr Makarov, Iaroslav Kolesnikov, Ivan Shchudlo, Timofey Bykov, Evgeniia Sokolova, Alexey Koshkarev, Vladimir Kanygin, Aleksandr Kichigin, Bryan J. Mathis, Eiichi Ishikawa and Akira Matsumura

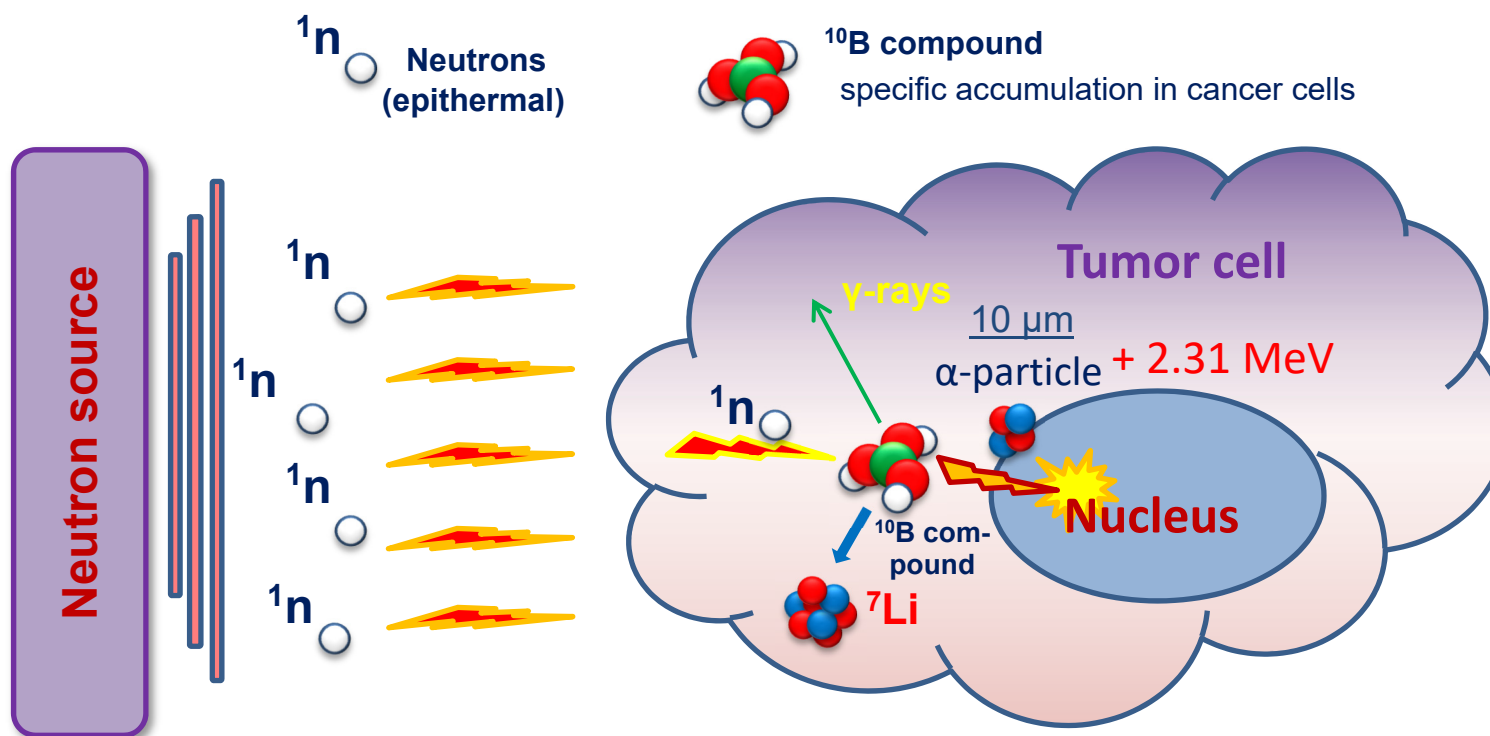

**Figure S1.** Principle of boron neutron capture therapy (BNCT). BNCT is a binary technology that is realized through boron-10 isotope accumulation in tumor cells and further irradiation of the tumor area with epithermal neutrons, leading to intracellular boron neutron capture reaction ( $^{10}\text{B}(\text{n},\alpha)^7\text{Li}$ ) resulting in the release of high-LET alpha particles and lithium ( $^7\text{Li}$ ) ions that damage tumor cell DNA.

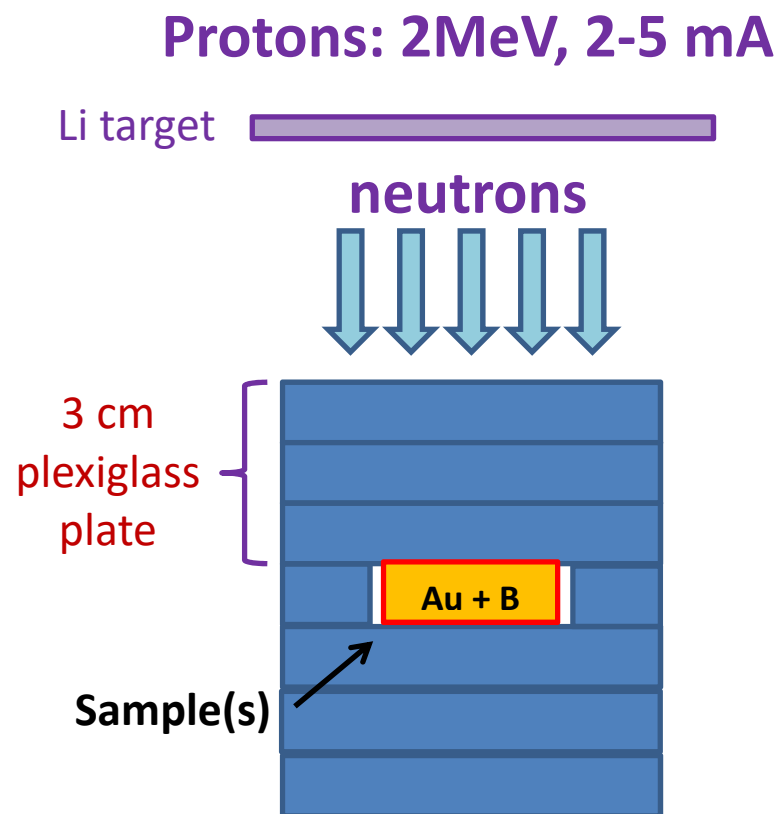

**Figure S2.** Combined compound irradiation. Cell-containing vials are placed in a plexiglass phantom (20 x 22 cm) at the depth of 3 cm under the neutron-producing target and irradiated with epithermal neutrons.

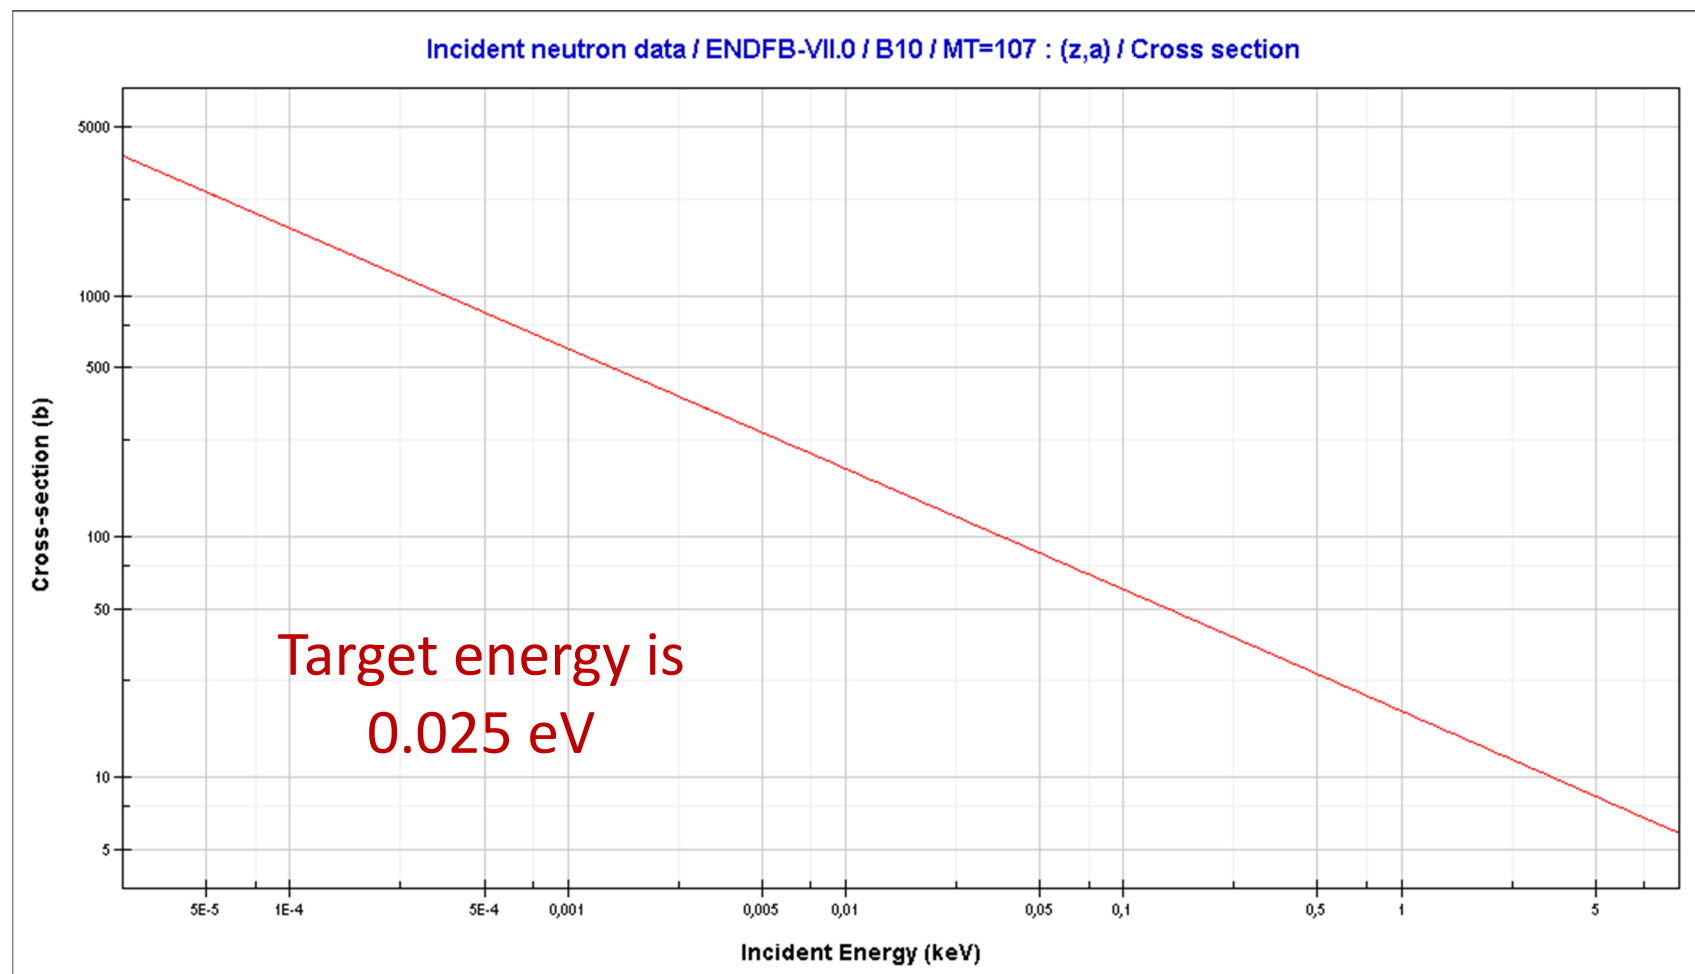

Figure S3.  $^{10}\text{B} (n,\alpha) ^7\text{Li}$  cross section.

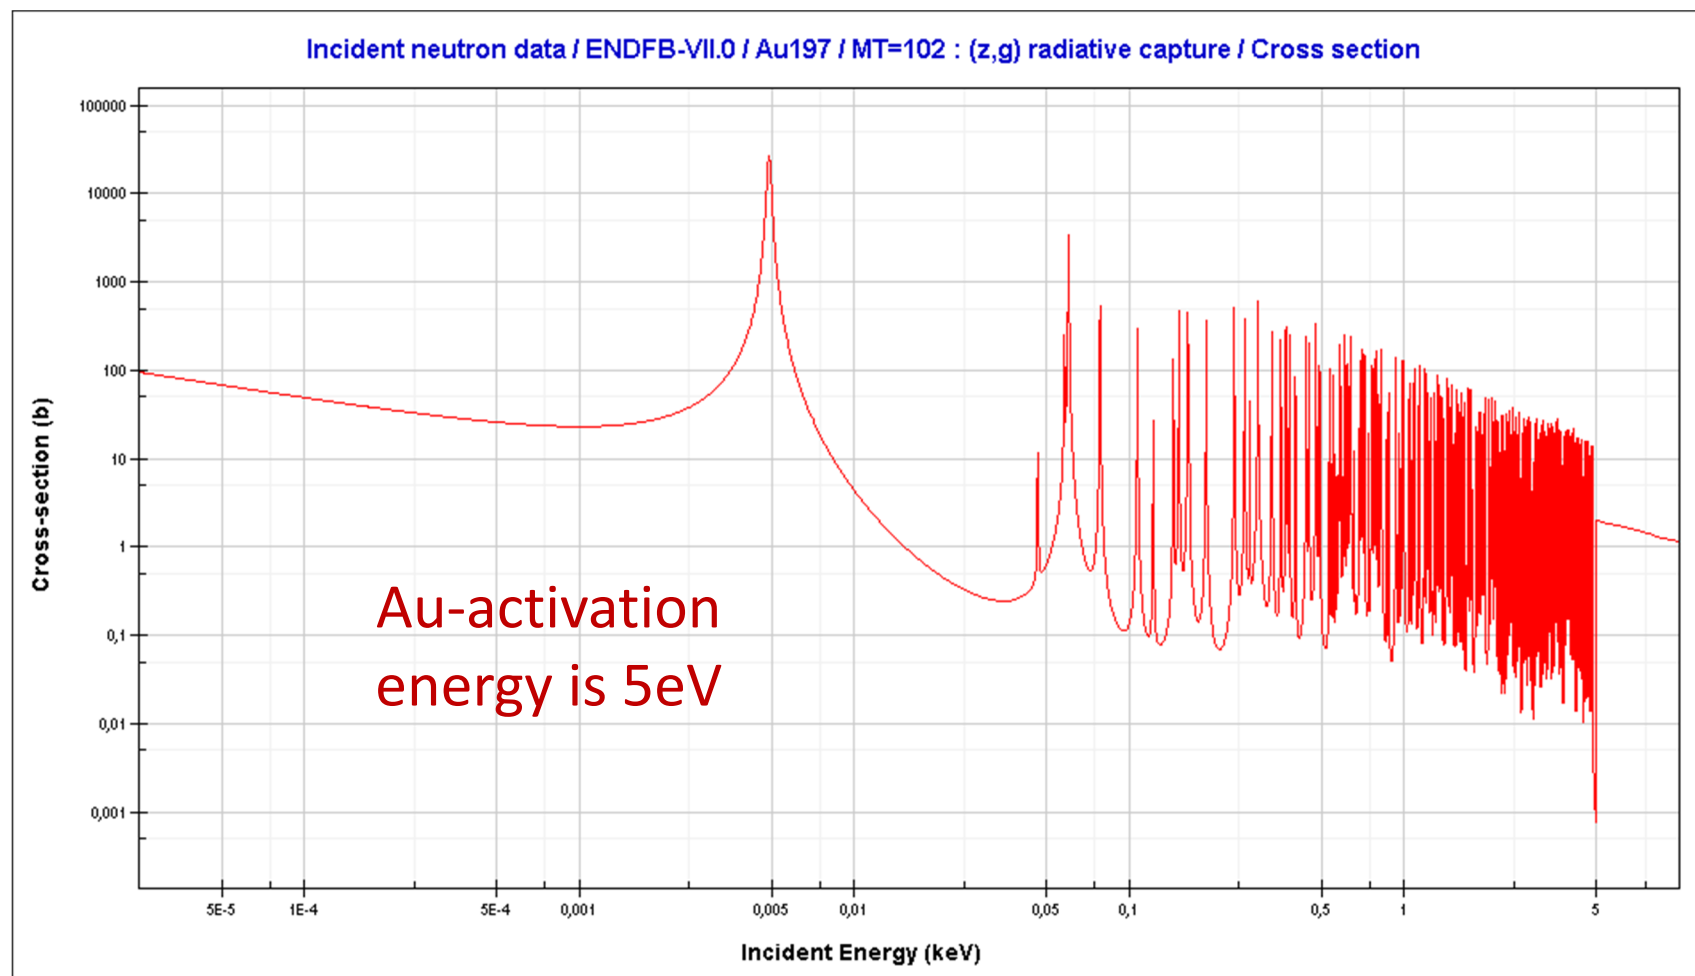

Figure S4.  $^{197}\text{Au}$  radioactive capture cross section.

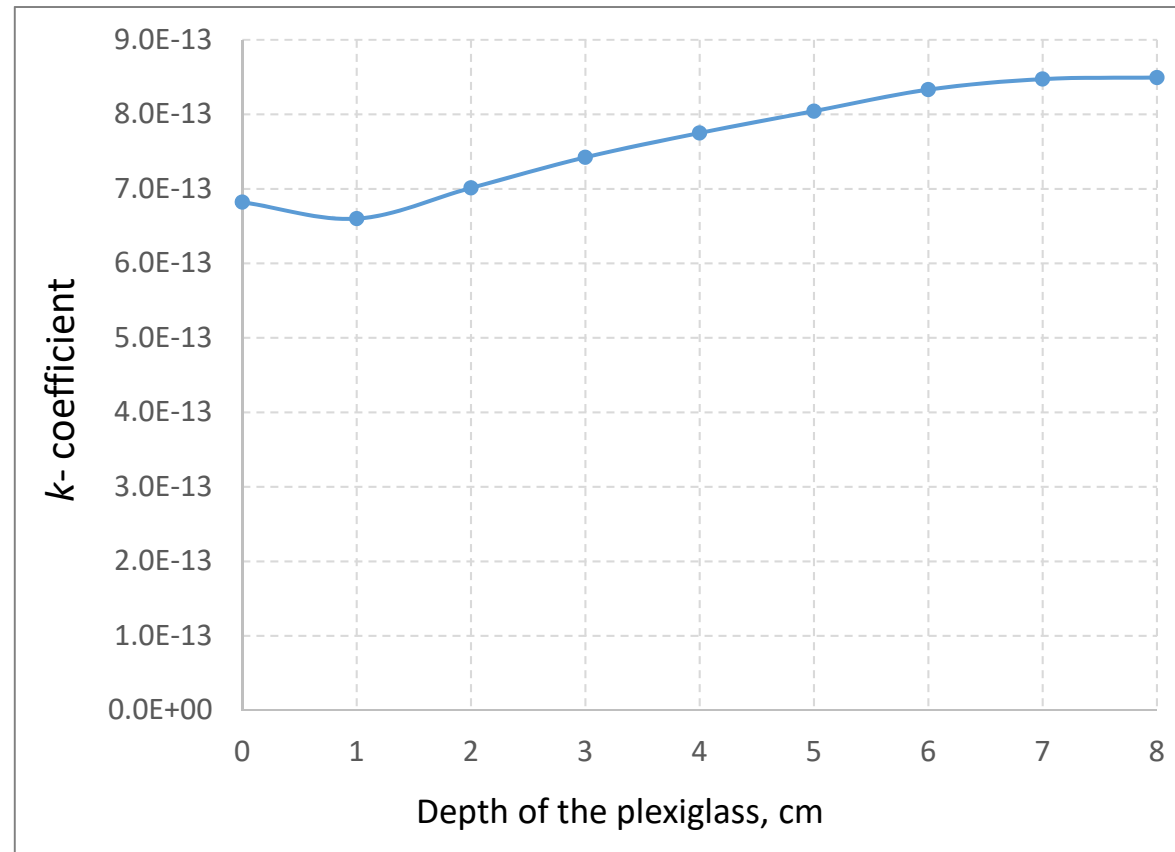

**Figure S5.** *k* – coefficient values versus depth of the plexiglas. The depth-related irradiation coefficient was calculated by Monte Carlo method calculated using the NMC code with 3D neutron transfer modeling according to ENDF-VII cross-section database.

| Depth (cm) | Dose from boron -10<br>(Gy/min) | Reaction rate<br>in 1g of Au |
|------------|---------------------------------|------------------------------|
| 0,4        | 2,59841                         | 9,36E+11                     |
| 0,8        | 3,34421                         | 9,39E+11                     |
| 1,2        | 3,79428                         | 8,65E+11                     |
| 1,6        | 4,06395                         | 7,71E+11                     |
| 2          | 4,20305                         | 6,75E+11                     |
| 2,4        | 4,239                           | 5,82E+11                     |
| 2,8        | 4,20214                         | 4,97E+11                     |
| 3,2        | 4,0982                          | 4,20E+11                     |
| 3,6        | 3,93107                         | 3,51E+11                     |
| 4          | 3,72389                         | 2,92E+11                     |
| 4,4        | 3,49357                         | 2,39E+11                     |
| 4,8        | 3,25098                         | 1,96E+11                     |
| 5,2        | 2,98715                         | 1,60E+11                     |
| 5,6        | 2,72229                         | 1,28E+11                     |
| 6          | 2,4771                          | 1,03E+11                     |

**Figure S6.** Evaluation of the most suitable depth in plexiglass depending on both boron neutron capture reaction and gold activation.

**Table S1.** Detailed calculations of estimated boron-related absorbed doses.

| Cells                                                                         | Initial<br>B conc.,<br>ppm | Number<br>of cells,<br>×10 <sup>6</sup> | Boron concentration, ppm    |                 |                  |                      | Mass of gold                    |                      |                        |                        |                                  | Count<br>rate<br>in<br>gold<br>line<br>by<br>HPGe | Decays<br>per<br>second | N –<br>number<br>of<br>activated<br>gold<br>atoms | D=(k×N×n)/m<br><br>Boron dose in<br>samples, GyE |       |
|-------------------------------------------------------------------------------|----------------------------|-----------------------------------------|-----------------------------|-----------------|------------------|----------------------|---------------------------------|----------------------|------------------------|------------------------|----------------------------------|---------------------------------------------------|-------------------------|---------------------------------------------------|--------------------------------------------------|-------|
|                                                                               |                            |                                         | In 10 <sup>6</sup><br>cells | In all<br>cells | In<br>1mL<br>MEM | In<br>cells +<br>MEM | In 10 <sup>6</sup><br>cells, µg | In 1mL<br>MEM,<br>µg | In all<br>cells,<br>µg | In<br>cells+MEM,<br>µg | Convert<br>to g                  |                                                   |                         |                                                   |                                                  |       |
| B- Au+                                                                        | 0                          | 2.75                                    | 0                           | 0               | 0                | 0                    | 47.57                           | 6.39                 | 130.82                 | 137.21                 | 1.37×10 <sup>4</sup>             | 10                                                | 212.77                  | 71421246                                          | 0                                                |       |
| B10 Au+                                                                       | 10                         | 3                                       | 0.049                       | 0.148           | 9.95             | 10.10                | 46.94                           | 3.06                 | 140.83                 | 143.89                 | 1.44×10 <sup>4</sup>             | 12.9                                              | 274.47                  | 92133408                                          | 4.80                                             |       |
| B20 Au+                                                                       | 20                         | 2.15                                    | 0.069                       | 0.148           | 19.95            | 20.10                | 43.22                           | 19.03                | 92.91                  | 111.94                 | 1.12×10 <sup>4</sup>             | 13.3                                              | 282.98                  | 94990257                                          | 12.65                                            |       |
| B40 Au+                                                                       | 40                         | 2.9                                     | 0.189                       | 0.549           | 39.82            | 40.37                | 48.54                           | 3.07                 | 140.78                 | 143.85                 | 1.44×10 <sup>4</sup>             | 12.9                                              | 274.47                  | 92133408                                          | 19.18                                            |       |
| B- Au+                                                                        | 0                          | 1.25                                    | 0                           | 0               | 0                | 0                    | 47.57                           | 30.18                | 59.46                  | 89.64                  | 8.96×10 <sup>5</sup>             | 12.9                                              | 274.47                  | 92133408                                          | 0                                                |       |
| B10 Au+                                                                       | 10                         | 1.7                                     | 0.049                       | 0.084           | 9.97             | 10.06                | 46.94                           | 23.40                | 79.80                  | 103.20                 | 1.03×10 <sup>4</sup>             | 10.3                                              | 219.15                  | 73563884                                          | 5.32                                             |       |
| B20 Au+                                                                       | 20                         | 2.1                                     | 0.069                       | 0.145           | 19.95            | 20.10                | 43.22                           | 19.75                | 90.75                  | 110.50                 | 1.11×10 <sup>4</sup>             | 10.3                                              | 219.15                  | 73563884                                          | 9.93                                             |       |
| B40 Au+                                                                       | 40                         | 2                                       | 0.189                       | 0.379           | 39.87            | 40.25                | 48.54                           | 17.64                | 97.09                  | 114.73                 | 1.15×10 <sup>4</sup>             | 8.8                                               | 187.23                  | 62850697                                          | 16.36                                            |       |
| B- Au+                                                                        | 0                          | 1.6                                     | 0                           | 0               | 0                | 0                    | 47.57                           | 24.63                | 76.11                  | 100.74                 | 1.01×10 <sup>4</sup>             | 11.9                                              | 253.19                  | 84991283                                          | 0                                                |       |
| B10 Au+                                                                       | 10                         | 1.4                                     | 0.049                       | 0.069           | 9.98             | 10.05                | 46.94                           | 28.09                | 65.72                  | 93.81                  | 9.38×10 <sup>5</sup>             | 11                                                | 234.04                  | 78563371                                          | 6.24                                             |       |
| B20 Au+                                                                       | 20                         | 1.75                                    | 0.069                       | 0.120           | 19.96            | 20.08                | 43.22                           | 24.79                | 75.63                  | 100.42                 | 1.00×10 <sup>4</sup>             | 6.9                                               | 146.81                  | 49280660                                          | 7.31                                             |       |
| B40 Au+                                                                       | 40                         | 1.1                                     | 0.189                       | 0.208           | 39.93            | 40.14                | 48.54                           | 32.20                | 53.40                  | 85.60                  | 8.56×10 <sup>5</sup>             | 8.1                                               | 172.34                  | 57851209                                          | 20.13                                            |       |
| Sensitivity HPGe in gold line<br>(411KeV)                                     |                            |                                         |                             |                 |                  |                      |                                 |                      |                        |                        | 0.047                            |                                                   |                         |                                                   |                                                  |       |
| D – boron dose, GyE                                                           |                            |                                         |                             |                 |                  |                      |                                 |                      |                        |                        | Cells/Exp                        | B-<br>Au+                                         | B10<br>Au+              | B20 Au+                                           | B40 Au+                                          |       |
| N – number of activated gold<br>atoms                                         |                            |                                         |                             |                 |                  |                      |                                 |                      |                        |                        | Boron dose<br>in samples,<br>GyE | 1                                                 | 0                       | 4.80                                              | 12.65                                            | 19.18 |
| n – boron concentration, ppm                                                  |                            |                                         |                             |                 |                  |                      | k=                              |                      |                        |                        |                                  | 2                                                 | 0                       | 5.32                                              | 9.93                                             | 16.36 |
| m – mass of gold, g                                                           |                            |                                         |                             |                 |                  |                      |                                 |                      |                        |                        |                                  | 3                                                 | 0                       | 6.24                                              | 7.31                                             | 20.13 |
| k – coefficient, which depends on the depth (cm) to the sample in the phantom |                            |                                         |                             |                 |                  |                      |                                 |                      |                        |                        | AVERAGE                          |                                                   | 0                       | 5.45                                              | 9.96                                             | 18.56 |
|                                                                               |                            |                                         |                             |                 |                  |                      |                                 |                      |                        |                        | SD                               |                                                   | 0                       | 0.73                                              | 2.67                                             | 1.96  |
